# Supplementary material
Source: Springer Nature journal article supplement (https://www.springermedizin.de/resource/supplementary/12879_2011_1886_MOESM2_ESM.pdf/9443922)

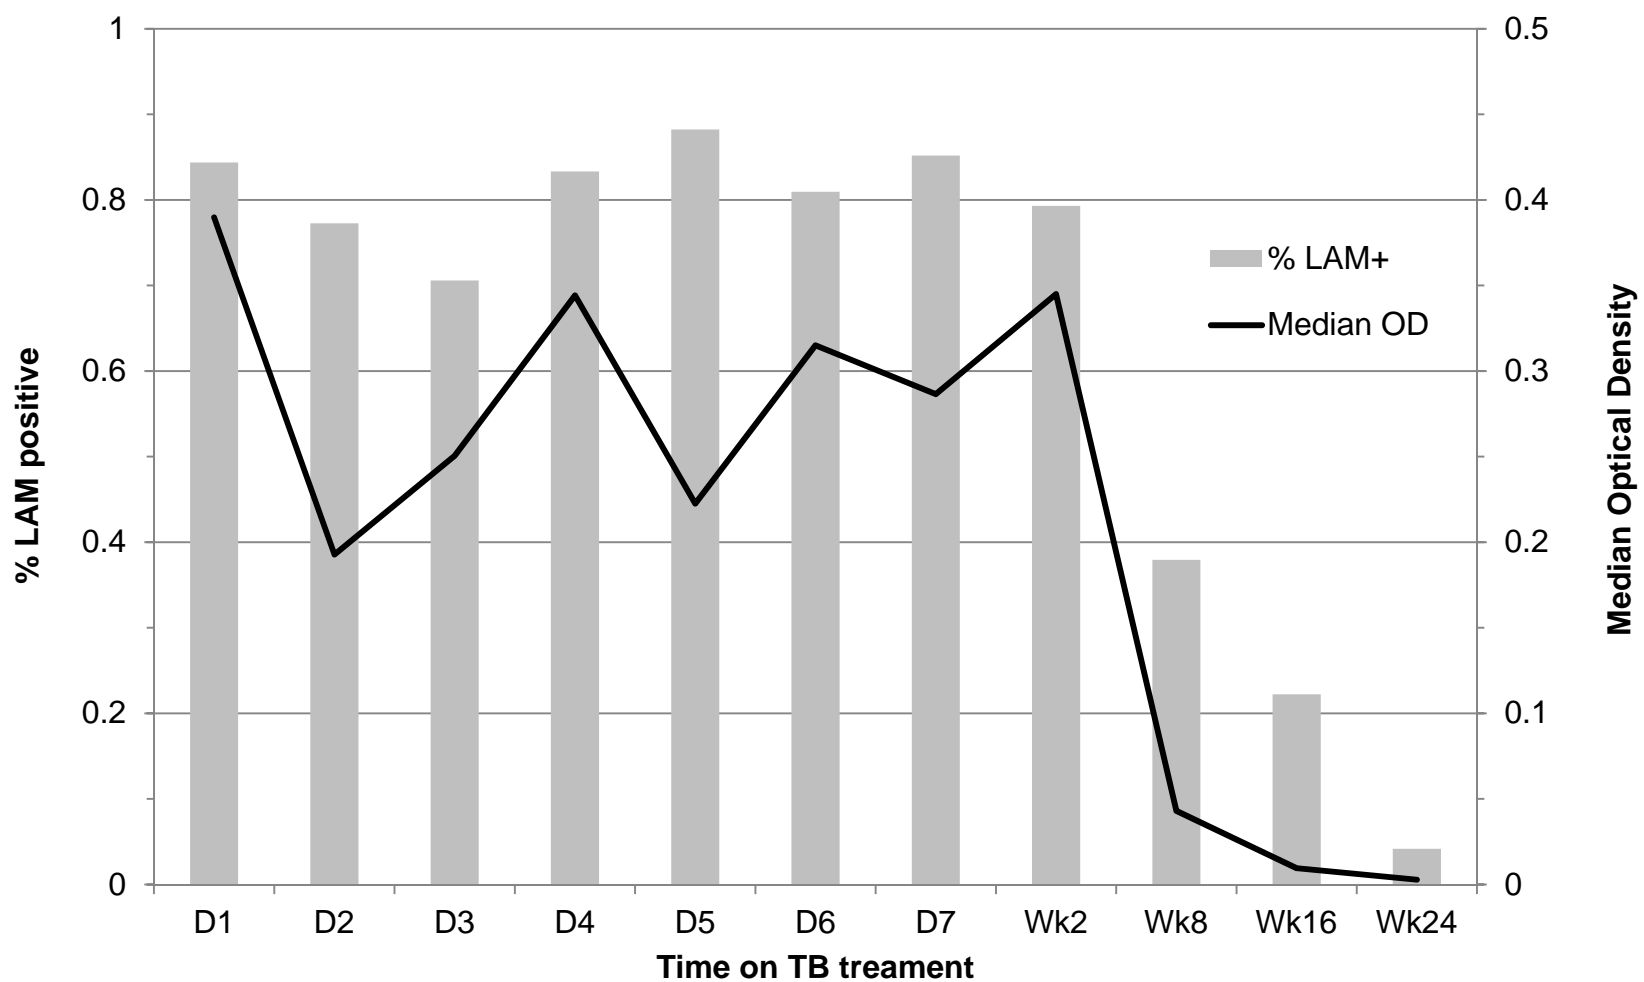

|                      |      |      |      |      |      |      |      |      |      |       |       |
|----------------------|------|------|------|------|------|------|------|------|------|-------|-------|
| <b>LAM Pos Tests</b> | 27   | 17   | 12   | 15   | 15   | 17   | 23   | 23   | 11   | 6     | 1     |
| <b>Total Tests</b>   | 32   | 22   | 17   | 18   | 17   | 21   | 27   | 29   | 29   | 27    | 24    |
| <b>Median OD</b>     | 0.39 | 0.19 | 0.25 | 0.34 | 0.22 | 0.32 | 0.29 | 0.35 | 0.04 | 0.01  | 0.00  |
| <b>IQR+</b>          | 0.74 | 0.48 | 0.63 | 0.55 | 0.57 | 0.65 | 0.99 | 0.84 | 0.24 | 0.06  | 0.01  |
| <b>IQR-</b>          | 0.14 | 0.11 | 0.07 | 0.16 | 0.16 | 0.12 | 0.12 | 0.16 | 0.01 | -0.01 | -0.01 |

Supplement: MOESM2 [file 9443922]
